# Supplementary material
Source: HighWire-hosted journal article supplement (https://svn.bmj.com/content/8/3/217)
Supplement: inline-supplementary-material-4 [file inline-supplementary-material-4.pdf]

**Supplemental Table 3: Pearson correlation coefficient of genes calculated in GTEx**

|       | ESR1                 | ESR2                | SHH                  | PTCH1                | SMO                 | GLI1                | OCLN                | CLDN3                | CLDN5                |
|-------|----------------------|---------------------|----------------------|----------------------|---------------------|---------------------|---------------------|----------------------|----------------------|
| ESR1  | R=1<br>P=0           | R=0.59<br>P=0       | R=0.3<br>P=0         | R=0.5<br>P=0         | R=0.19<br>P=3.6e-09 | R=0.34<br>P=0       | R=0.34<br>P=0       | R=0.4<br>P=0         | R=-0.00061<br>P=0.98 |
| ESR2  | R=0.59<br>P=0        | R=1<br>P=0          | R=0.049<br>P=0.13    | R=0.81<br>P=0        | R=0.16<br>P=1.1e-06 | R=0.53<br>P=0       | R=0.5<br>P=0        | R=0.71<br>P=0        | R=-0.013<br>P=0.68   |
| SHH   | R=0.3<br>P=0         | R=0.049<br>P=0.13   | R=1<br>P=0           | R=-0.12<br>P=0.00031 | R=0.08<br>P=0.012   | R=0.088<br>P=0.0061 | R=-0.039<br>P=0.22  | R=-0.14<br>P=1.2e-05 | R=0.14<br>P=1.1e-05  |
| PTCH1 | R=0.5<br>P=0         | R=0.81<br>P=0       | R=-0.12<br>P=0.00031 | R=1<br>P=0           | R=0.19<br>P=9.6e-10 | R=0.61<br>P=0       | R=0.51<br>P=0       | R=0.78<br>P=0        | R=-0.16<br>P=3.9e-07 |
| SMO   | R=0.19<br>P=3.6e-09  | R=0.16<br>P=1.1e-06 | R=0.08<br>P=0.012    | R=0.19<br>P=9.6e-10  | R=1<br>P=0          | R=0.34<br>P=0       | R=0.17<br>P=8.1e-08 | R=0.14<br>P=9.9e-06  | R=0.26<br>P=0        |
| GLI1  | R=0.34<br>P=0        | R=0.53<br>P=0       | R=0.088<br>P=0.0061  | R=0.61<br>P=0        | R=0.34<br>P=0       | R=1<br>P=0          | R=0.24<br>P=7.5e-14 | R=0.46<br>P=0        | R=-0.079<br>P=0.014  |
| OCLN  | R=0.34<br>P=0        | R=0.5<br>P=0        | R=-0.039<br>P=0.22   | R=0.51<br>P=0        | R=0.17<br>P=8.1e-08 | R=0.24<br>P=7.5e-14 | R=1<br>P=0          | R=0.48<br>P=0        | R=0.17<br>P=4e-08    |
| CLDN3 | R=0.4<br>P=0         | R=0.71<br>P=0       | R=-0.14<br>P=1.2e-05 | R=0.78<br>P=0        | R=0.14<br>P=9.9e-06 | R=0.46<br>P=0       | R=0.48<br>P=0       | R=1<br>P=0           | R=-0.11<br>P=0.00053 |
| CLDN5 | R=-0.00061<br>P=0.98 | R=-0.013<br>P=0.68  | R=0.14<br>P=1.1e-05  | R=-0.16<br>P=3.9e-07 | R=0.26<br>P=0       | R=-0.079<br>P=0.014 | R=0.17<br>P=4e-08   | R=-0.11<br>P=0.00053 | R=1<br>P=0           |
