# Supplementary material
Source: HighWire-hosted journal article supplement (https://svn.bmj.com/content/8/3/217)

## Western blots related to Figure 2H

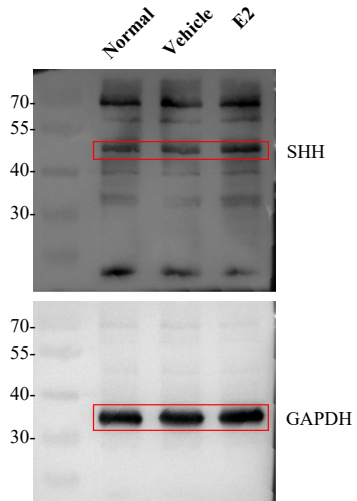

## Western blots related to Figure 3C

## Western blots related to Figure 3A

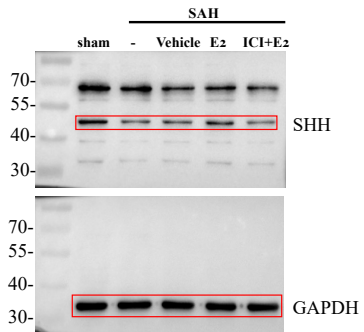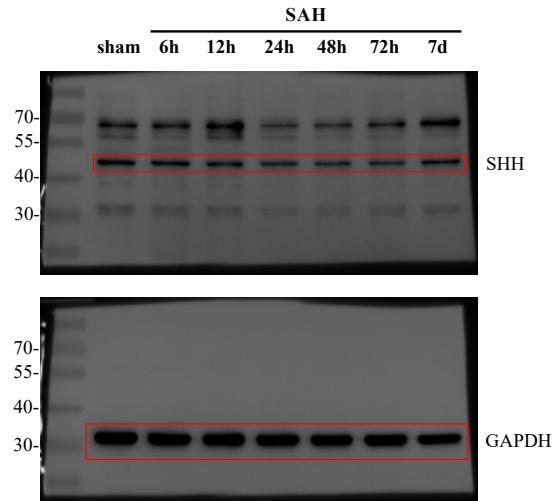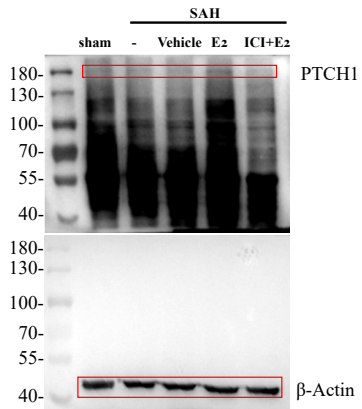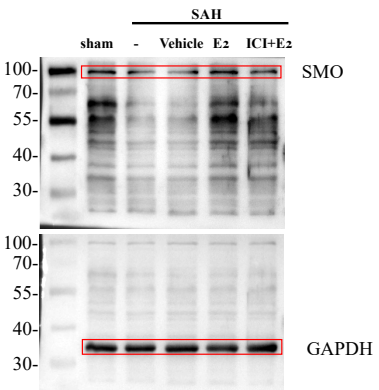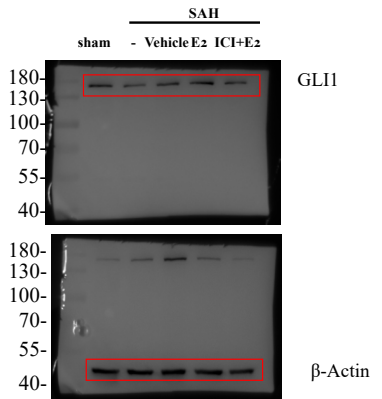

Western blots related to Figure 4A

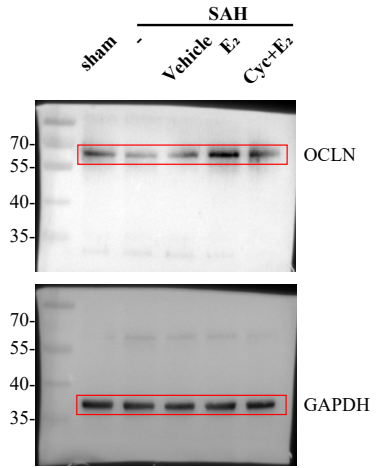

Western blots related to Figure 4B

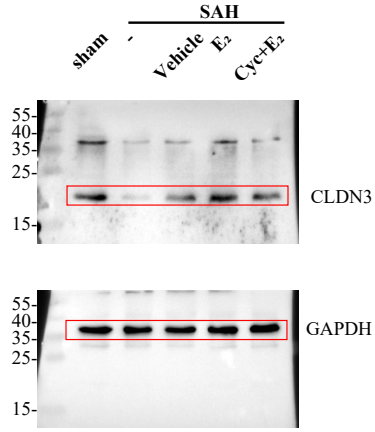

Western blots related to Figure 4C

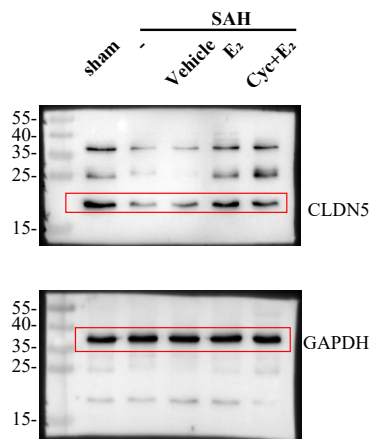

Western blots related to Figure 4E

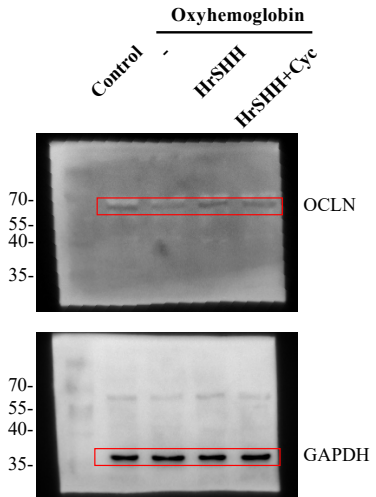

Western blots related to Figure 4F

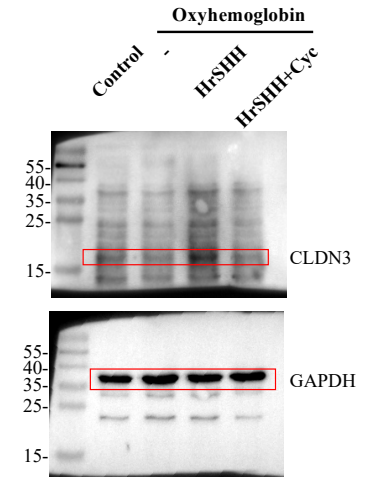

Western blots related to Figure 4G

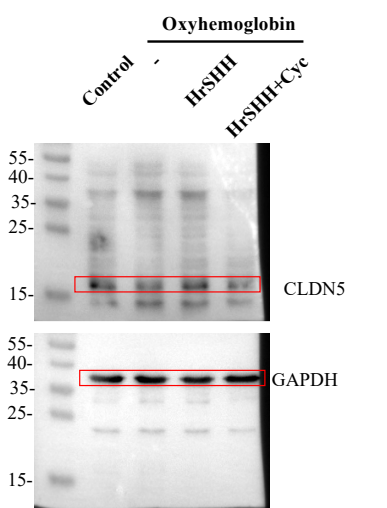

Supplement: inline-supplementary-material-5 [file inline-supplementary-material-5.pdf]
