# Supplementary material
Source: HighWire-hosted journal article supplement (https://svn.bmj.com/content/8/3/217)
Supplement: inline-supplementary-material-6 [file inline-supplementary-material-6.pdf]

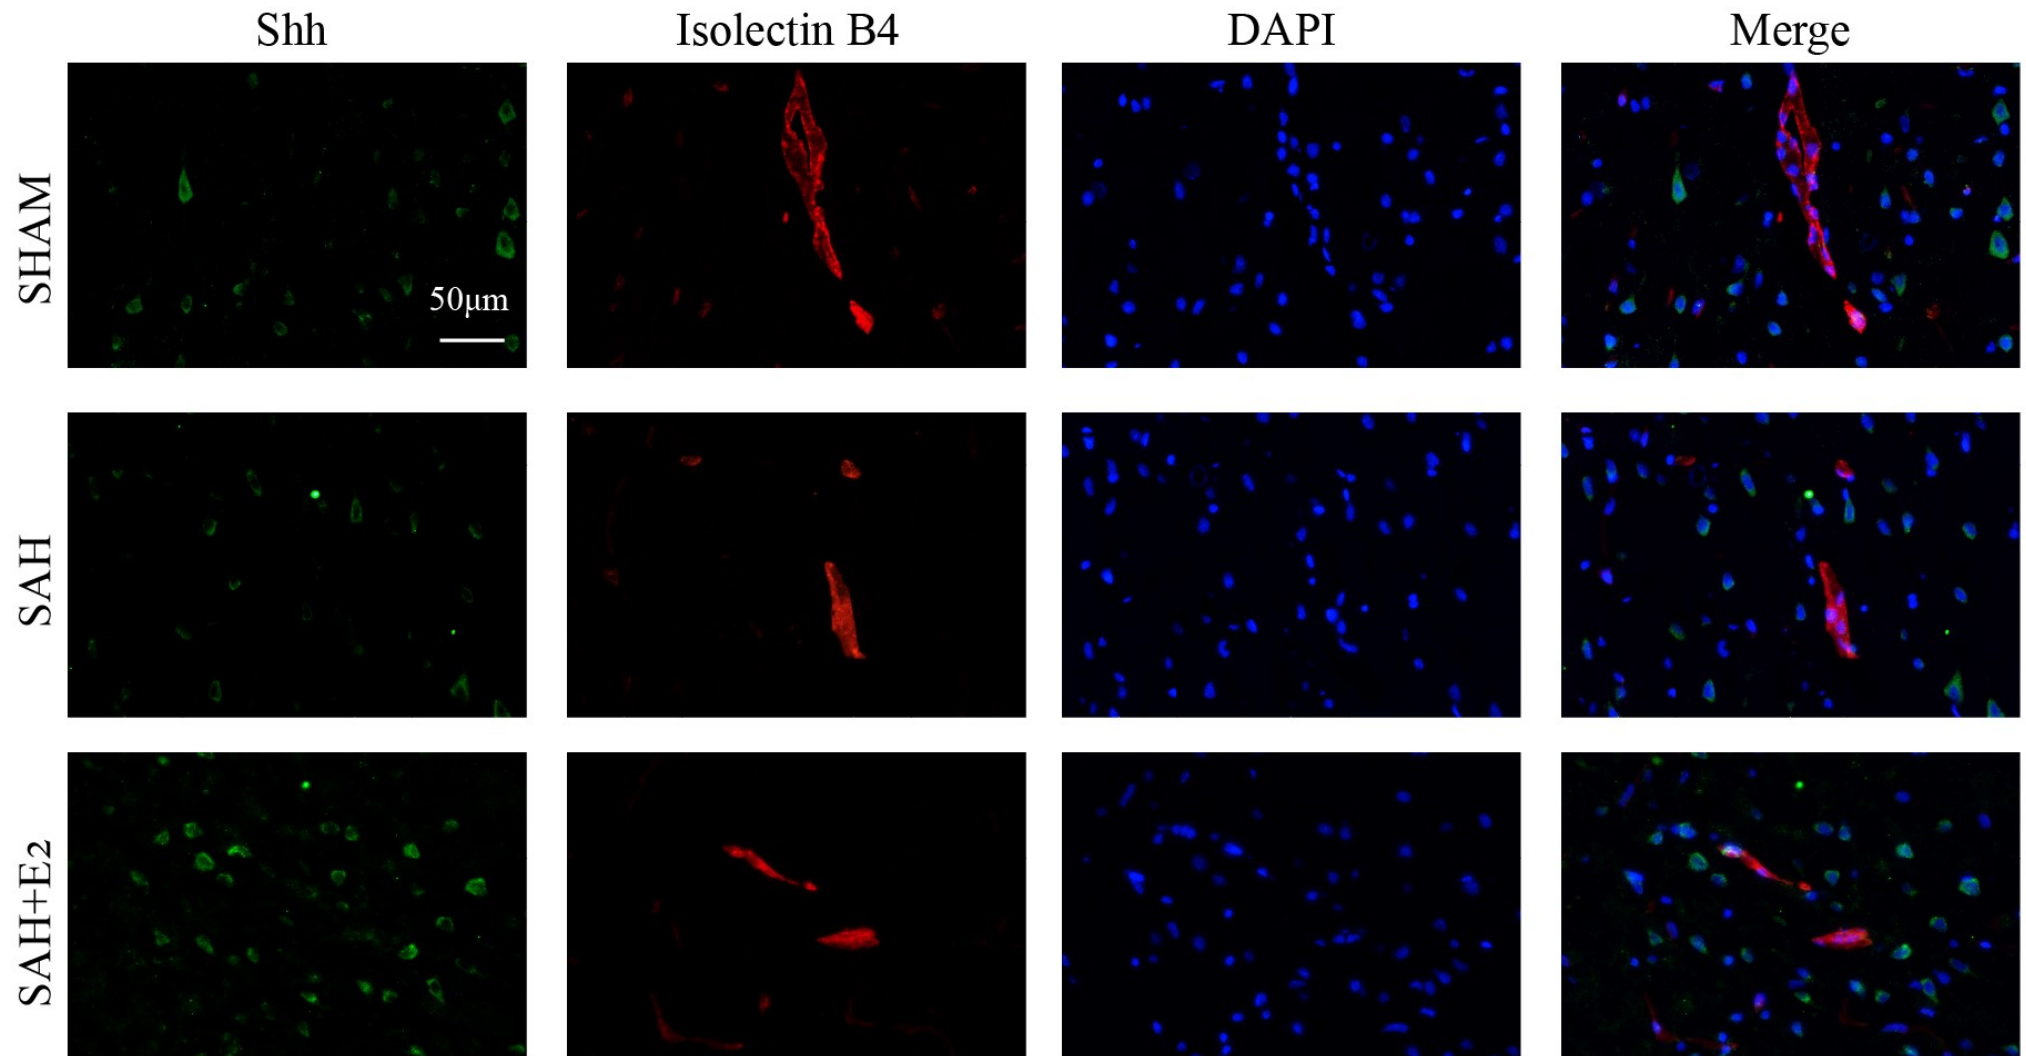

Fig S1 | No SHH distribution was found in the endothelial cells after subarachnoid hemorrhage. Immunofluorescence staining was performed with antibodies against Shh (green) and Isolectin B4 (red), while DAPI (blue) was used to label the nucleus. Scale bar = 50  $\mu$ m. [E2]: estrogen.
