# Supplementary material
Source: HighWire-hosted journal article supplement (https://svn.bmj.com/content/8/3/217)
Supplement: inline-supplementary-material-7 [file inline-supplementary-material-7.pdf]

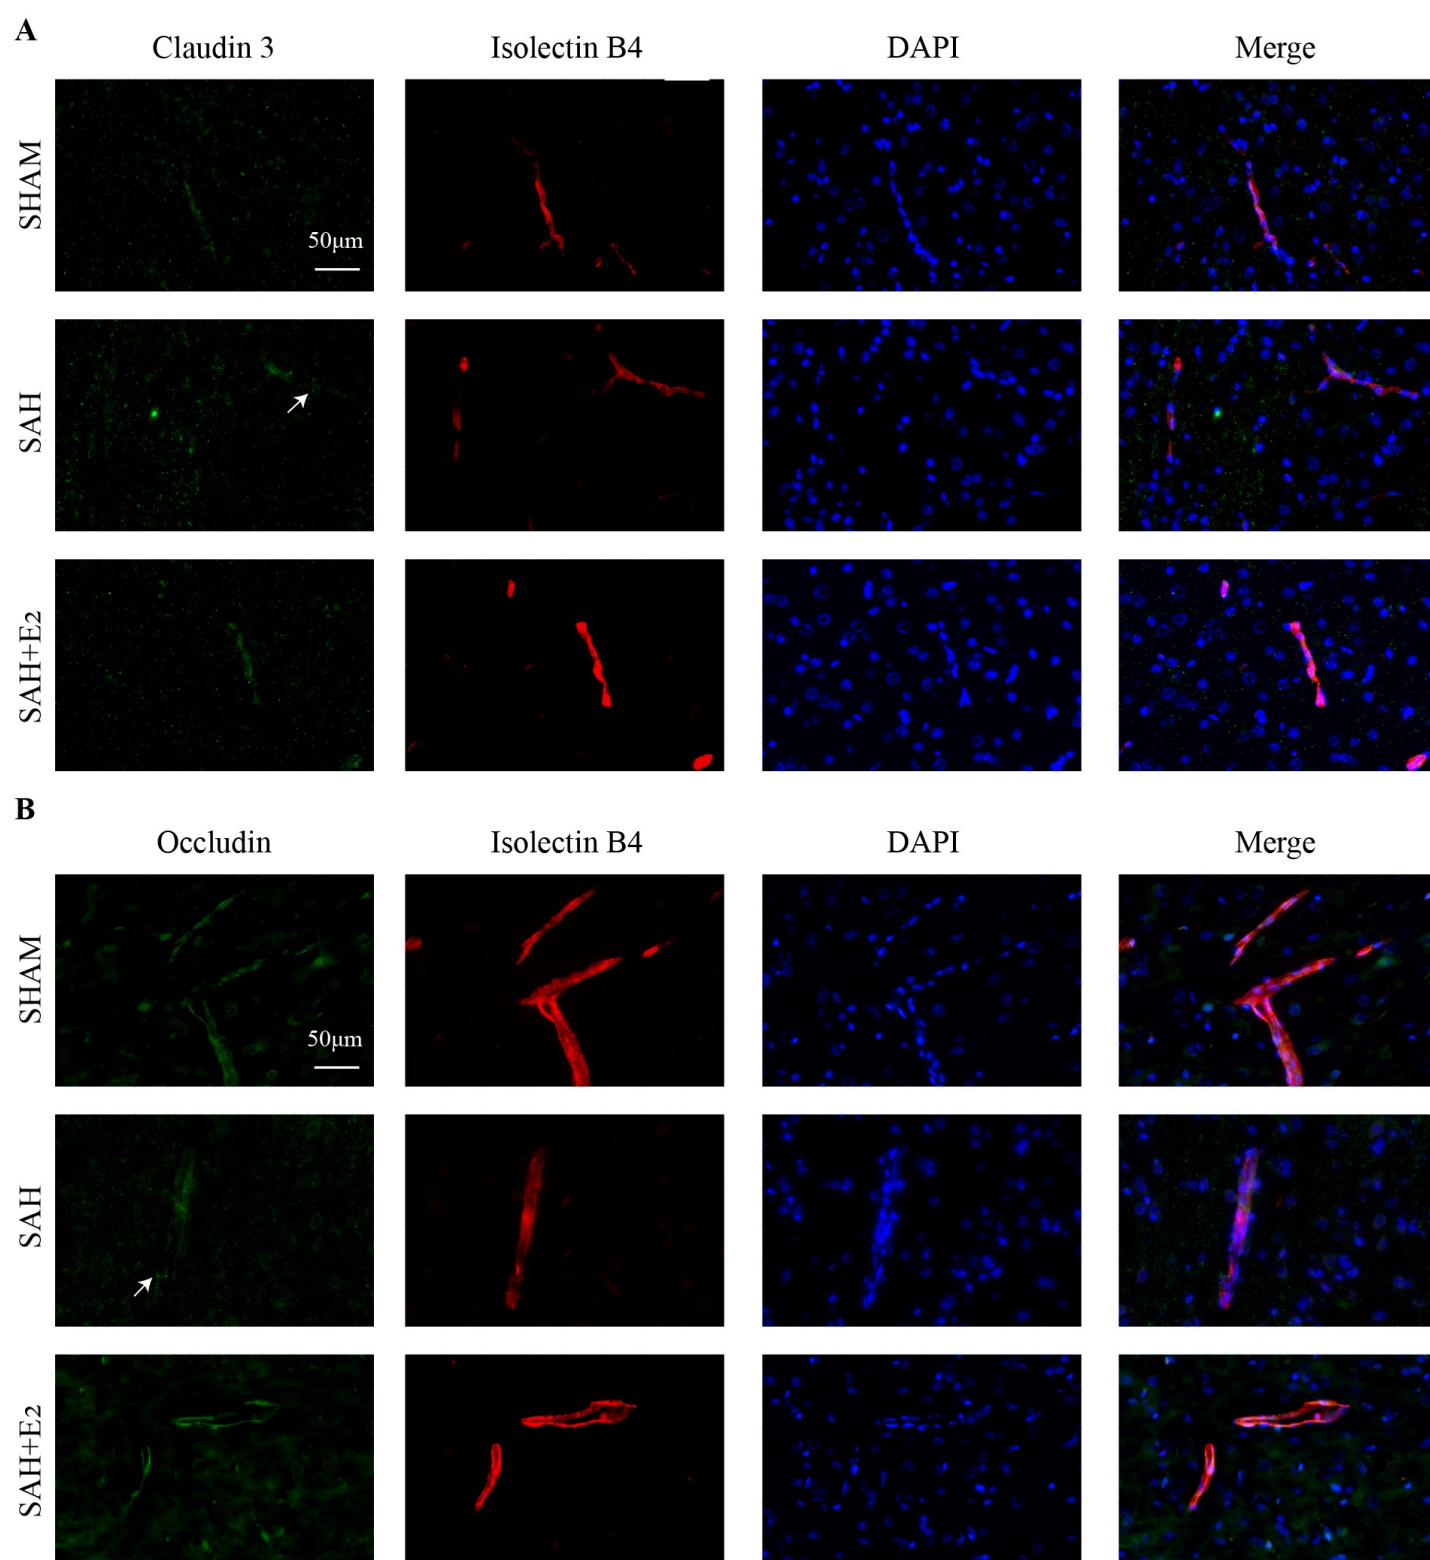

Fig S2 | Estrogen upregulates tight junction protein expression after subarachnoid hemorrhage. (A)Immunofluorescence staining was performed with antibodies against Claudin 3 (green) and Isolectin B4 (red), while DAPI (blue) was used to label the nucleus. (B)Immunofluorescence staining was performed with antibodies against Occludin (green) and Isolectin B4 (red), while DAPI (blue) was used to label the nucleus. Scale bar = 50  $\mu$ m. [E2]: estrogen.
